# Supplementary material for: The ATR Inhibitor AZD6738 Synergizes with Gemcitabine In Vitro and In Vivo to Induce Pancreatic Ductal Adenocarcinoma Regression
Source: Oxford University Press journal article supplement (doi:10.1158/1535-7163.mct-18-0010), 2018-06-11
Supplement: 15357163mct180010-sup-194961_2_supp_4742766_p8f15h.docx [file 15357163mct180010-sup-194961_2_supp_4742766_p8f15h.docx]

**Supplementary Table 1**


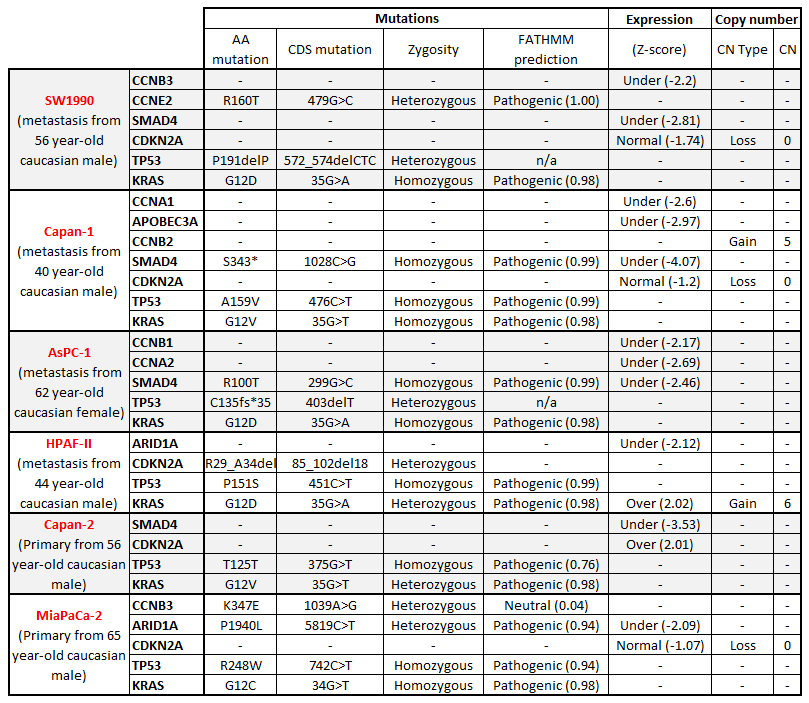


**Supplementary Table 1. Genetic alterations likely to sensitize to ATR inhibition in the human PDAC cell lines**

Genetic alterations in the human PDAC cell lines, for all the genes in Fig. 1A (COSMIC, <http://cancer.sanger.ac.uk/cosmic>). Note that no sequencing data was available for Panc-1.
